# Supplementary material for: Purification and Characterization of a Dark Red Skin Related Dimeric Polyphenol Oxidase from Huaniu Apples
Source: MDPI journal article supplement (doi:10.3390/foods11121790), 2022-06-17
Supplement: s1 [file s1]

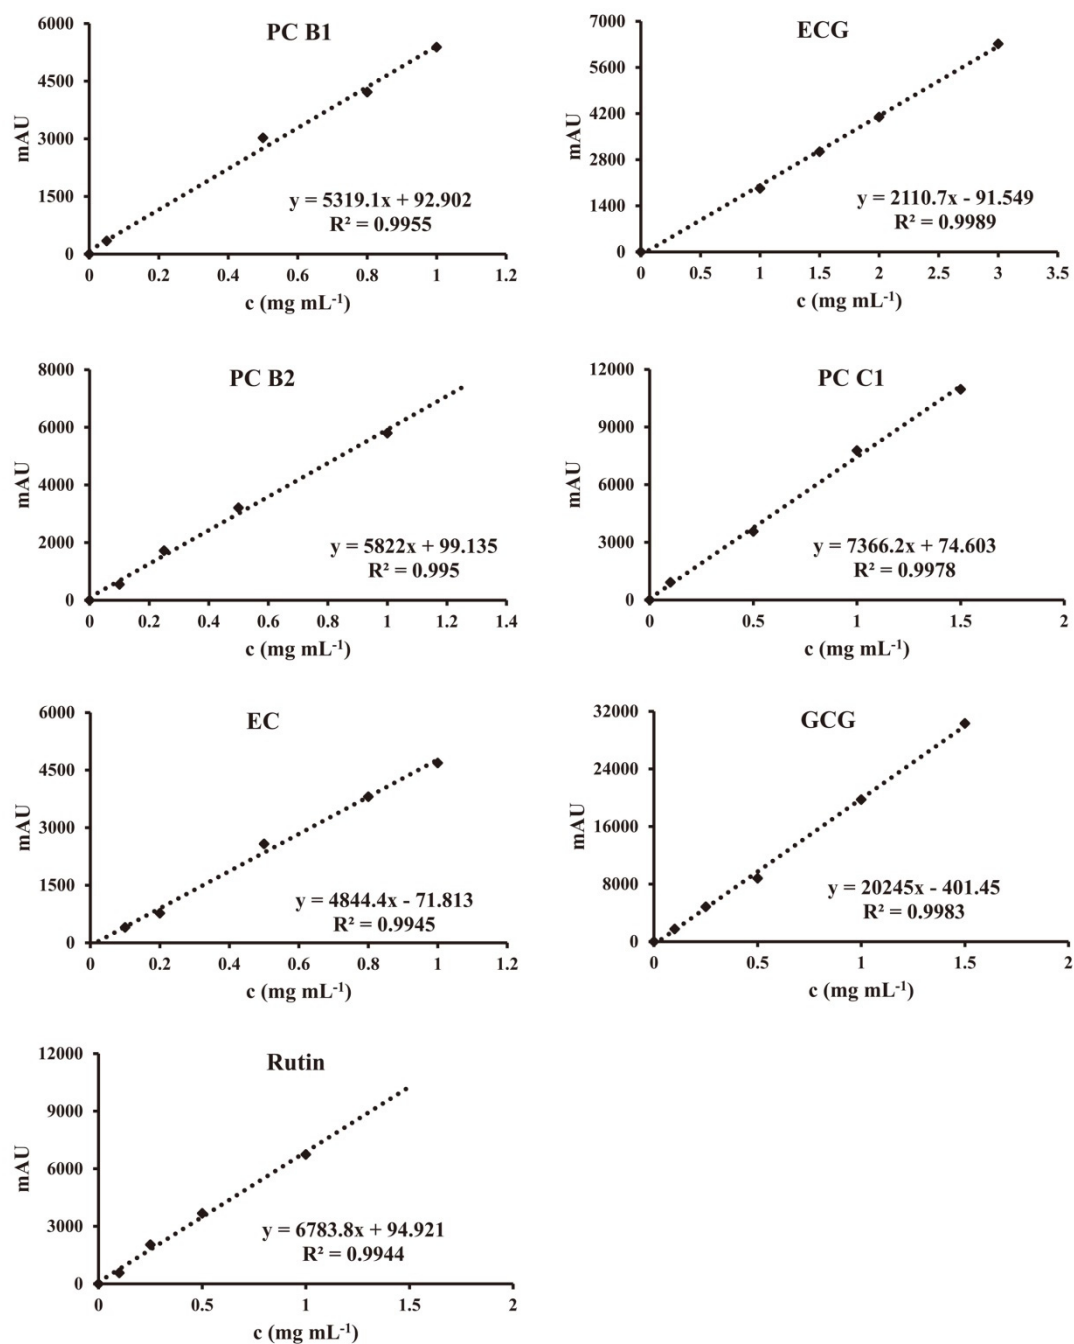

**Figure S1.** The standard curves of the flavan-3-ol and PC compounds.

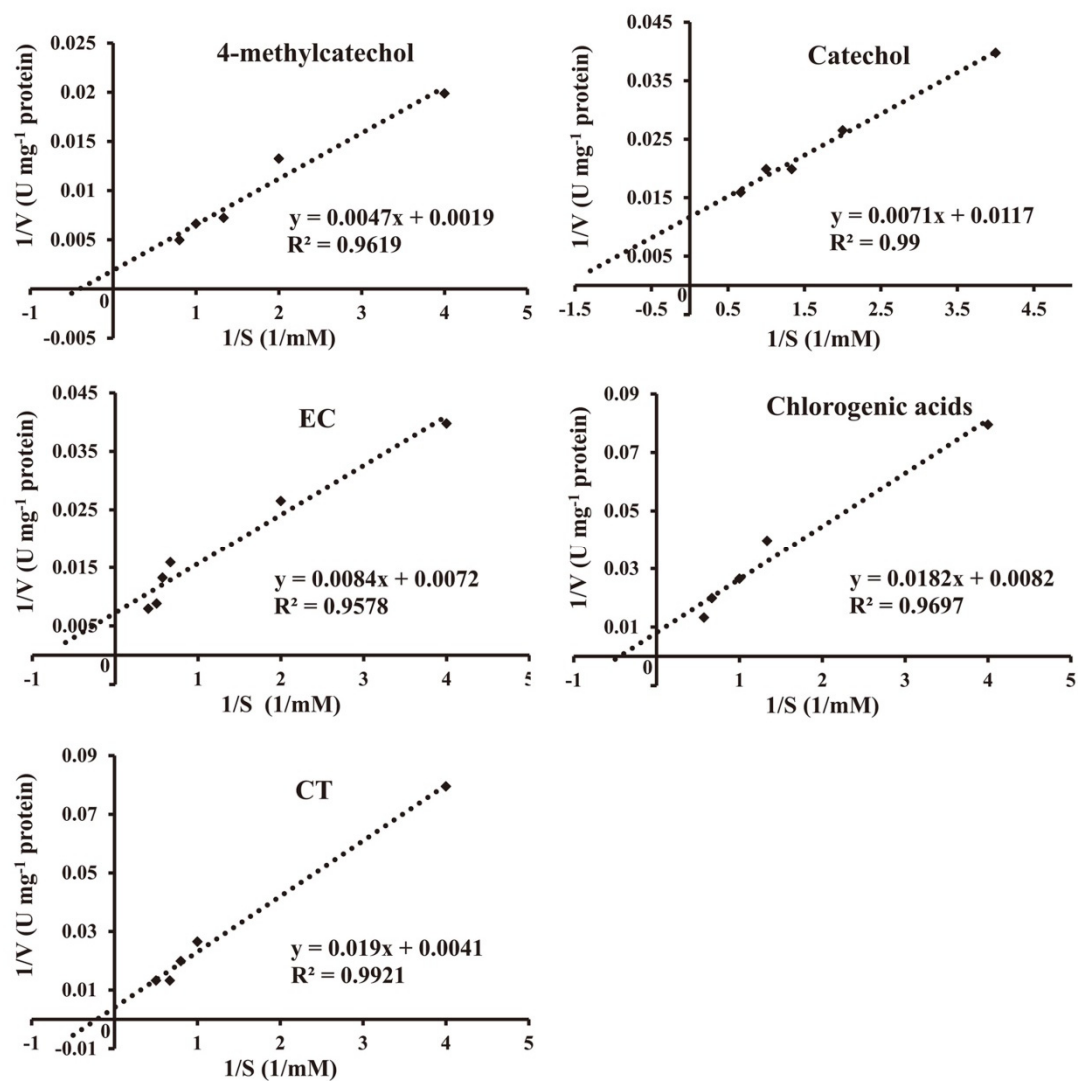

**Figure S2.** Line weaver-Burk plots for kinetic parameter measurement of the dimeric PPO from Huanian peel.
